# Supplementary material
Source: HighWire-hosted journal article supplement (https://tsaco.smart01.highwire.org/content/8/1/e001188)
Supplement: inline-supplementary-material-1 [file inline-supplementary-material-1.pdf]

| Author name            | Country        | Duration  | Total population (n) | Female (%) | Mean age (Years) | Cause of fracture                                                                                 | Type of healing (non-union)                                                        | Primary Management of Clavicle fracture     | Type of surgery for Nonunion                                                                        | Net risk of bias |
|------------------------|----------------|-----------|----------------------|------------|------------------|---------------------------------------------------------------------------------------------------|------------------------------------------------------------------------------------|---------------------------------------------|-----------------------------------------------------------------------------------------------------|------------------|
| Wick et al. (2001)     | Germany        | 1993-1998 | 60                   | 33.3       | 36.4             | Sports, fall, car, bicycle, and motorcycle                                                        | Nonunion, delayed union fracture with shortening of more than 2 cm                 | Both Operative and Non-operative management | LDLC plate for internal fixation, a reconstruction plate, autogenous bone grafting, and a wire loop | low              |
| Robinson et al. (2004) | Scotland       | 1997-2001 | 918                  | 26.5%      | 29.5             | N/A*                                                                                              | Nonunion<br><br>Displaced or undisplaced fracture of medial, lateral, and midshaft | Non-operative management                    | Open reduction                                                                                      | low              |
| Murray et al. (2013)   | United Kingdom | 1994-2007 | 941                  | 27.95      | 36.8             | Simple falls, a fall from height, a bicycle injury, another type of traffic accident, and assault | Nonunion of displaced-midshaft clavicular fracture                                 | Non-operative management                    | Open reduction and plate fixation                                                                   | low              |
| Robinson et al. (2013) | United Kingdom | 2007-2010 | 200                  | 12.5       | 32.4             | Simple falls, RTAs, sports, and motorcycle                                                        | Nonunion of displaced-midshaft clavicular fracture                                 | Non-operative management                    | Open reduction and plate fixation                                                                   | low              |
| Clement et al. (2016)  | United Kingdom | 2007-2010 | 92                   | 13         | 32.2             | Fracture due to accident                                                                          | Nonunion of displaced-midshaft clavicular fracture                                 | Non-operative management                    | Open reduction and plate fixation                                                                   | low              |

|                         |                |           |     |        |       |                                                                                |                                                                                     |                          |                                                                             |     |
|-------------------------|----------------|-----------|-----|--------|-------|--------------------------------------------------------------------------------|-------------------------------------------------------------------------------------|--------------------------|-----------------------------------------------------------------------------|-----|
| Ban et al. (2016)       | Denmark        | 2008-2014 | 55  | 27.27  | 46    | N/A*                                                                           | Nonunion<br><br>Displaced or undisplaced fracture of medial, lateral, and midshaft. | NA*                      | Autologous bone grafts, hook-plate, and lateral pre-contoured locking plate | low |
| Jarvis et al. (2017)    | United Kingdom | 2008-2012 | 82  | 24.39  | 31.08 | Fall from height, sport, assault, RTA, horse riding and mechanism not recorded | Nonunion of displaced or shortened midshaft fracture                                | Operative management     | Plate fixation                                                              | low |
| Nicholson et al. (2019) | United Kingdom | 2007-2017 | 184 | 29.3   | 44.5  | N/A*                                                                           | Nonunion, delayed union of midshaft fracture                                        | Non-operative management | Open reduction and plate fixation                                           | low |
| Nicholson et al. (2020) | United Kingdom | N/A*      | 200 | 25     | 39.8  | Fall, sports, RTAs, and others                                                 | Nonunion of displaced-midshaft clavicular fracture                                  | Non-operative management | Plate fixation                                                              | low |
| Lim et al. (2021)       | South Korea    | 1999-2017 | 34  | 385.29 | 40.8  | Motor vehicle accident<br><br>Fall down.<br><br>Sports-related injuries        | Nonunion of displaced-midshaft clavicular fracture                                  | Operative management     | Plate osteosynthesis with autologous dual bone graft                        | low |

**Table 1. Baseline demographic and clinical characteristics. N/A\*: Not Applicable**

| Studies                | Selection (Maximum 4)                    |                                     |                           |                                                                              | Comparability (Maximum 2) | Outcome (Maximum 3)   |                                                 |                                  | Total score |
|------------------------|------------------------------------------|-------------------------------------|---------------------------|------------------------------------------------------------------------------|---------------------------|-----------------------|-------------------------------------------------|----------------------------------|-------------|
|                        | Representativeness of the Exposed Cohort | Selection of the Non-Exposed Cohort | Ascertainment of Exposure | Demonstration That Outcome of Interest Was Not Present at the Start of Study |                           | Assessment of Outcome | Was Follow-Up Long Enough for Outcomes to Occur | Adequacy of Follow-Up of Cohorts |             |
| Jarvis et al., 2017    | 1                                        | 1                                   | 1                         | 1                                                                            | 2                         | 1                     | 1                                               | 1                                | 9           |
| Nicholson et al., 2020 | 1                                        | 1                                   | 1                         | 1                                                                            | 2                         | 1                     | 1                                               | 1                                | 9           |
| Murray et al., 2013    | 1                                        | 1                                   | 1                         | 1                                                                            | 2                         | 1                     | 1                                               | 1                                | 9           |
| Ban et al., 2016       | 1                                        | 1                                   | 1                         | 1                                                                            | 2                         | 1                     | 1                                               | 1                                | 9           |
| Lim et al., 2021       | 1                                        | 1                                   | 1                         | 1                                                                            | 2                         | 1                     | 1                                               | 1                                | 9           |
| Clement et al., 2016   | 1                                        | 1                                   | 1                         | 1                                                                            | 2                         | 1                     | 1                                               | 1                                | 9           |
| Nicholson et al., 2019 | 1                                        | 1                                   | 1                         | 1                                                                            | 1                         | 1                     | 1                                               | 1                                | 8           |
| Lim et al., 2021       | 1                                        | 1                                   | 1                         | 1                                                                            | 2                         | 1                     | 1                                               | 1                                | 9           |
| Robinson et al., 2004  | 1                                        | 1                                   | 1                         | 1                                                                            | 2                         | 1                     | 1                                               | 1                                | 9           |

Table 2. Quality Assessment of Cohorts

| Study                 | Random sequence generation | Allocation concealment | Blinding (participants and personnel) | Blinding (outcome assessment) | Incomplete outcome data | Selective reporting | Other sources of bias | Net Risk      |
|-----------------------|----------------------------|------------------------|---------------------------------------|-------------------------------|-------------------------|---------------------|-----------------------|---------------|
| Robinson et al., 2013 | Low Risk                   | Low Risk               | Unclear Risk                          | Unclear Risk                  | Low Risk                | Unclear Risk        | Unclear Risk          | Moderate Risk |

**Table 3. Quality Assessment of Randomized Control Trials**
